# Supplementary material
Source: publisher site journal article supplement (https://www.dovepress.com/article/486270)
Supplement: Supplementary file 1 [file get_supplementary_file.php]

**Supplementary table 1.** Knowledge, attitude and practice dimensions.

| **Knowledge** | | | | | **Correct** | | |
| --- | --- | --- | --- | --- | --- | --- | --- |
| **n** | **%** | |
| K1. Postoperative rehabilitation for breast cancer includes functional exercises, psychological interventions, and a proper diet. (True) | | | | | 552 | 95.50 | |
| K2. Postoperative functional exercises can improve lymphatic reflux in the upper limbs and reduce edema degree in the affected limbs. (True) | | | | | 496 | 85.81 | |
| K3. Postoperative functional exercises should be started as early as possible. (True) | | | | | 458 | 79.24 | |
| K4. Postoperative functional exercises can promote the recovery of fine movements of the hand and upper limb, enhance the mobility of the shoulder joint and strengthen muscle strength. (True) | | | | | 514 | 88.93 | |
| K5. Postoperative psychological care can help to reduce mental stress, control emotions and maintain an optimistic state of mind. (True) | | | | | 516 | 89.27 | |
| K6. Postoperative psychological care does not affect the postoperative survival rate. (False) | | | | | 253 | 43.77 | |
| K7. For breast cancer patients, undergoing mastectomy will affect their self-image, and receiving a combination of chemotherapy and endocrine therapy will reduce their estrogen levels, affecting their sexual health. (True) | | | | | 402 | 69.55 | |
| K8. A healthy and moderate sex life is beneficial to the physical and psychological recovery of breast cancer patients. (True) | | | | | 399 | 69.03 | |
| K9. The diet should be modified after surgery: such as increasing the intake of a variety of fruits and vegetables, choosing whole grains or high-fiber foods, and limiting the intake of saturated fatty acids, trans-unsaturated fatty acids, cholesterol, alcohol, and sugar. (True) | | | | | 480 | 83.04 | |
| K10. The reduction in estrogen levels after breast cancer surgery and continued radiotherapy may lead to which of the following diseases | | | | |  |  | |
| K10.1. Osteoporosis (True) | | | | | 416 | 71.97 | |
| K10.2. Menopausal syndrome (True) | | | | | 391 | 67.65 | |
| K10.3. Hyperlipidemia (True) | | | | | 348 | 60.21 | |
| K10.4. Cardiovascular system diseases (True) | | | | | 351 | 60.73 | |
| K10.5. Respiratory system diseases (True) | | | | | 308 | 53.29 | |
| **Attitude** | **Strongly agree** | **Agree** | **Neutral** | **Disagree** | | | **Strongly disagree** |
| **n (%)** | **n (%)** | **n (%)** | **n (%)** | | | **n (%)** |
| A1. My charge nurse explains clearly the instructions for postoperative functional exercises. | 289 (50.00) | 259 (44.81) | 29 (5.02) | 0 | | | 1 (0.17) |
| A2. I was able to understand and grasp the instructions for postoperative functional exercises effectively. | 235 (40.66) | 302 (55.25) | 37 (6.40) | 4 (0.69) | | | 0 |
| A3. I believe that postoperative rehabilitation exercises are effective. | 258 (44.64) | 265 (45.85) | 47 (8.13) | 8 (1.38) | | | 0 |
| A4. I think the process of postoperative rehabilitation exercises is painful. | 138 (23.88) | 259 (44.81) | 101 (17.47) | 70 (12.11) | | | 10 (1.73) |
| A5. I think that maintaining a healthy and calm state of mind is helpful for recovery. | 295 (51.04) | 235 (40.66) | 38 (6.57) | 9 (1.56) | | | 1 (0.17) |
| A6. I think the postoperative radiotherapy and chemotherapy have not caused me any discomfort. | 81 (14.01) | 204 (35.29) | 93 (16.09) | 146 (25.26) | | | 54 (9.34) |
| A7. I feel confident about having regular postoperative rehabilitation. | 220 (38.06) | 262 (45.33) | 79 (13.67) | 16 (2.77) | | | 1 (0.17) |
| **Practice** | **Always** | **Often** | **Sometimes** | **Rarely** | | | **Never** |
|  | n (%) | n (%) | n (%) | n (%) | | | n (%) |
| P1. I should pay attention to the intensity and progress of my postoperative rehabilitation exercises and inform the medical staff promptly when I feel uncomfortable. | 181 (31.31) | 242 (41.87) | 96 (16.61) | 50 (8.65) | | | 9 (1.56) |
| P2. I will adhere to the postoperative rehabilitation exercises and will not give up halfway. | 163 (28.20) | 263 (45.50) | 102 (17.65) | 35 (6.06) | | | 15 (2.60) |
| P3. I will take the initiative to seek help from doctors and nurses for postoperative psychological support after surgery. | 148 (25.61) | 220 (38.06) | 133 (23.01) | 54 (9.34) | | | 23 (3.98) |
| P4. I will pay close attention to adverse reactions after surgery and during subsequent treatment. | 171 (29.58) | 270 (46.71) | 102 (17.65) | 30 (5.19) | | | 5 (0.87) |
| P5. I will pay close attention to my diet and stop smoking, and limit alcohol. | 230 (39.79) | 211 (36.51) | 101 (17.47) | 30 (5.19) | | | 6 (1.00) |
| P6. I will have regular postoperative reviews focusing on blood lipids, liver function, osteoporosis, and other indicators. | 229 (39.62) | 221 (38.24) | 97 (16.78) | 27 (4.67) | | | 4 (0.69) |
| P7. I will take the initiative to learn about postoperative rehabilitation and encourage my family to learn about it together. | 185 (32.01) | 229 (39.62) | 115 (19.90) | 40 (6.92) | | | 9 (1.56) |

**Supplementary table 2.** Structural equation model fit.

| Indicators | Reference | Actual |
| --- | --- | --- |
| CMIN/DF | 1-3: Excellent, 3-5: Good | 3.081 |
| RMSEA | <0.08: Good | 0.060 |
| IFI | >0.8: Good | 0.857 |
| TLI | >0.8: Good | 0.836 |
| CFI | >0.8: Good | 0.856 |
| GFI | >0.8: Good | 0.885 |
